# Supplementary material for: A new stratospheric and tropospheric NO 2 retrieval algorithm for nadir-viewing satellite instruments: applications to OMI
Source: Copernicus journal article supplement (doi:10.5194/amt-6-2607-2013), 2013-10-15
Supplement: Supplementary file 1 [file amt-6-2607-2013-supplement.pdf]

1 Supplemental Section

2

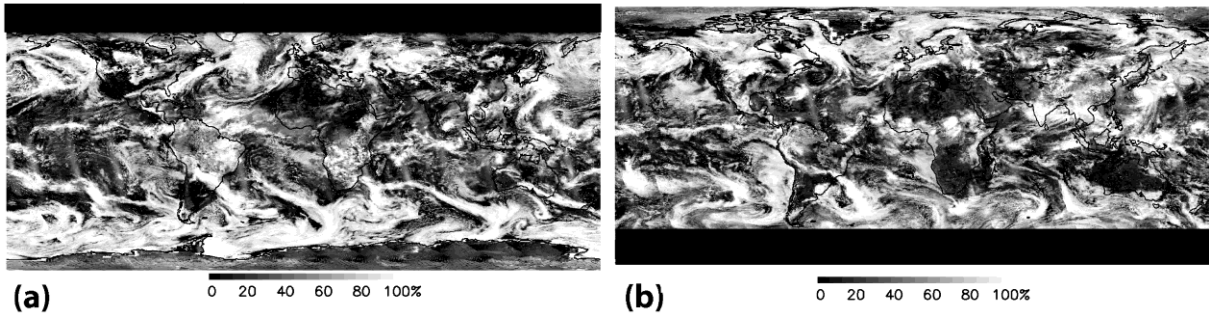

3

4 **Figure S1:** Cloud radiance fraction for (a) 15 January 2005 and (b) 25 July 2005.

5

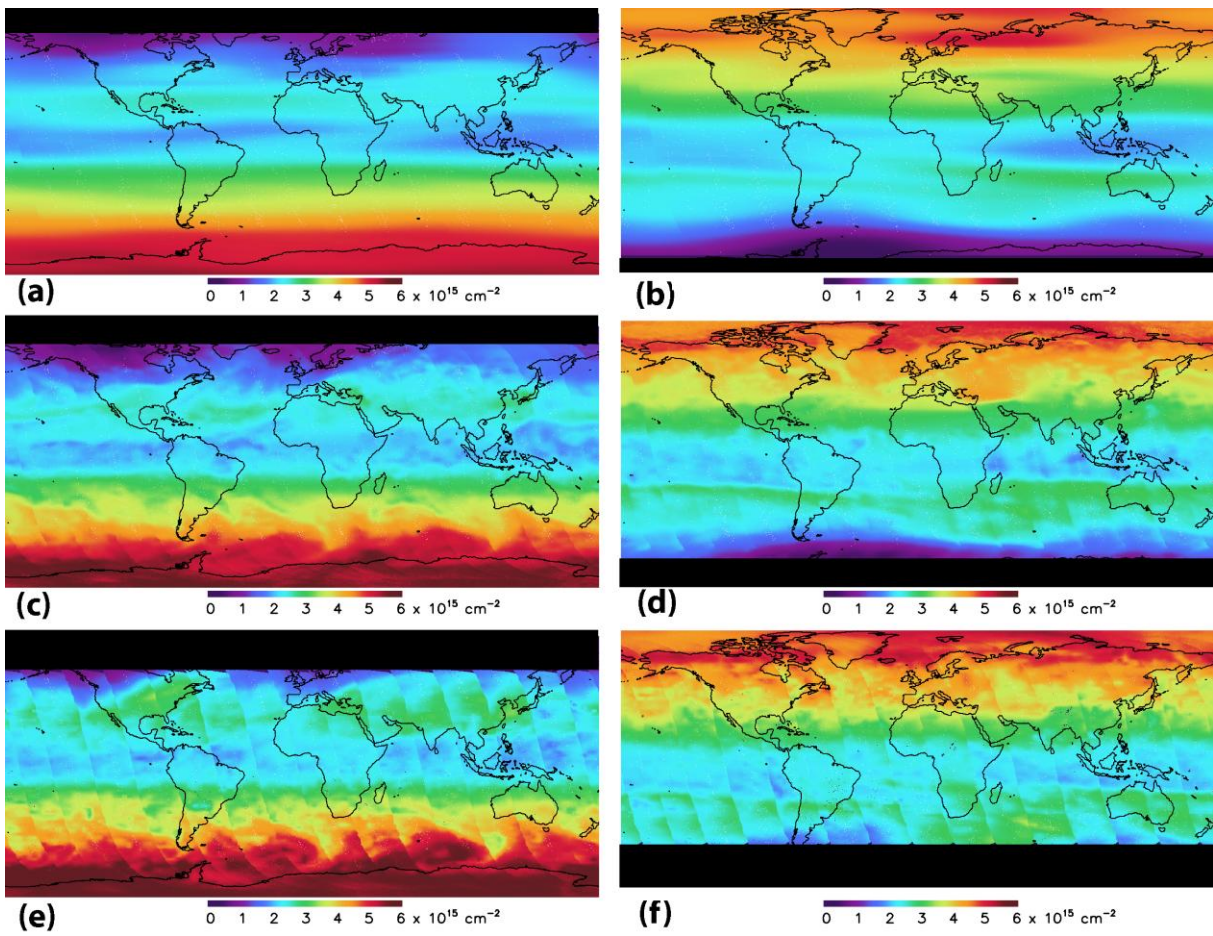

6

7 **Figure S2:** Stratospheric NO<sub>2</sub> vertical columns for 15 January 2005 from (a) SP1, (c) SP2,  
8 and (e) DOMINO. Stratospheric NO<sub>2</sub> vertical columns for 25 July 2005 from (b) SP1, (d)  
9 SP2 and (f) DOMINO.

10

1

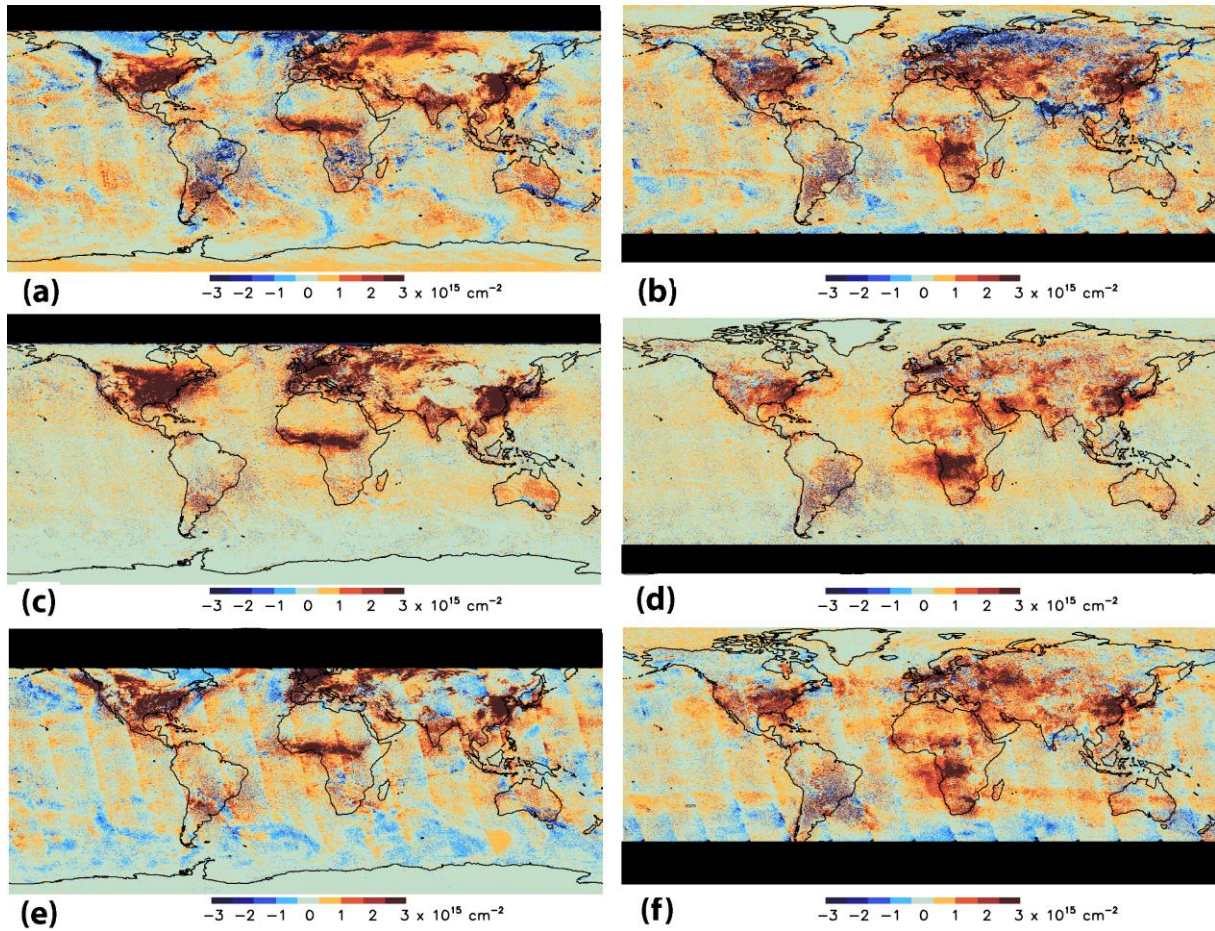

2

3 **Figure S3:** Tropospheric NO<sub>2</sub> vertical columns for 15 January 2005 from (a) SP1, (c) SP2,  
4 and (e) DOMINO. Tropospheric NO<sub>2</sub> vertical columns for 25 July 2005 from (b) SP1, (d)  
5 SP2 and (f) DOMINO.

6

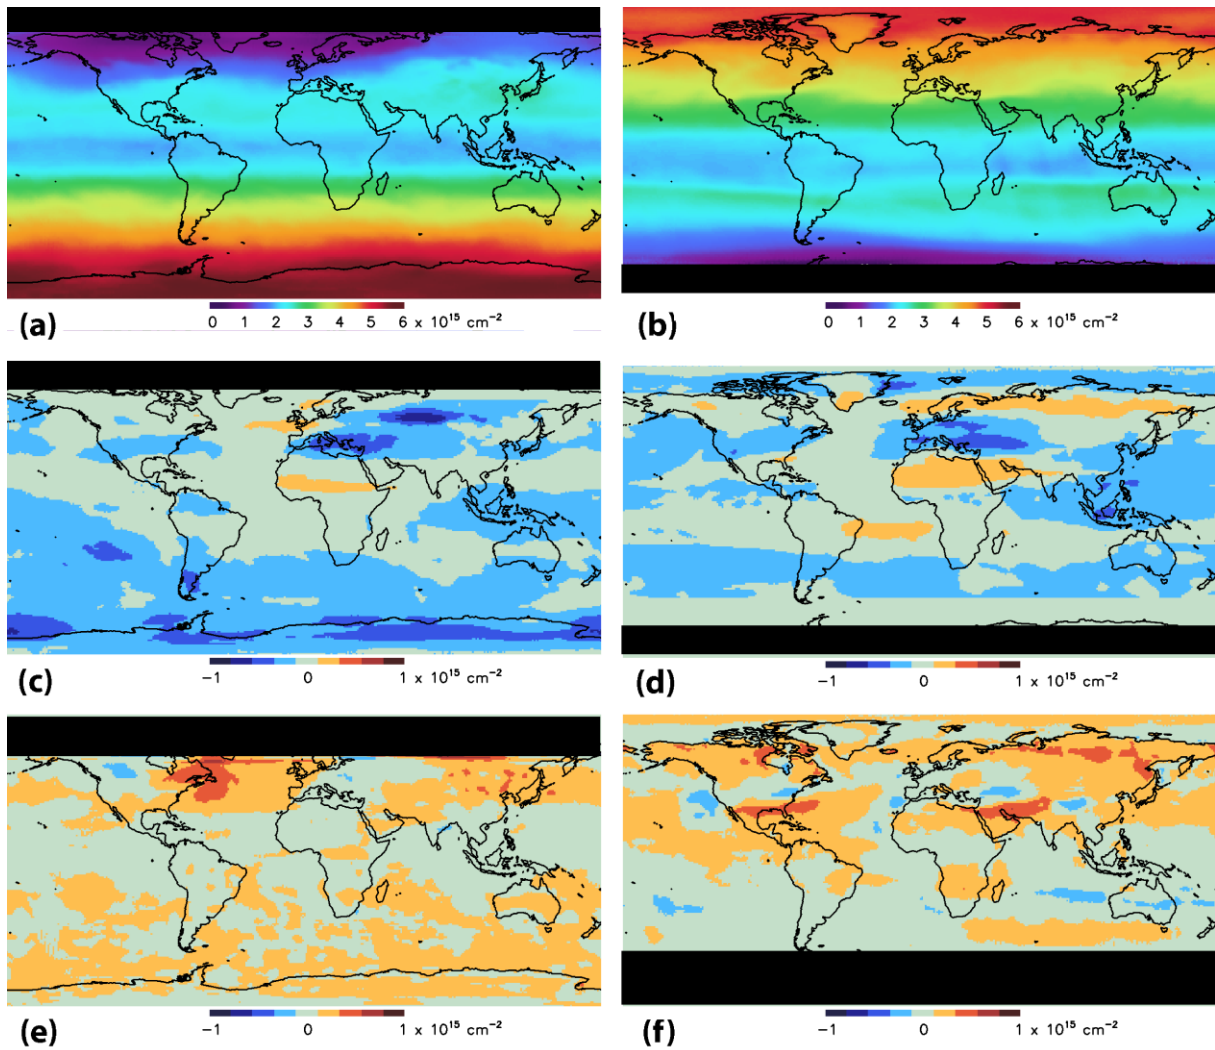

1  
 2 **Figure S4:** (a) Monthly mean stratospheric NO<sub>2</sub> vertical columns for January 2005 from SP2.  
 3 Monthly means of stratospheric NO<sub>2</sub> differences for January 2005: (c) SP1 – SP2 and (e)  
 4 DOMINO – SP2. (b) Monthly mean stratospheric NO<sub>2</sub> vertical columns for July 2005 from  
 5 SP2. Monthly means of stratospheric NO<sub>2</sub> differences for July 2005: (d) SP1 – SP2 and (f)  
 6 DOMINO – SP2.

1

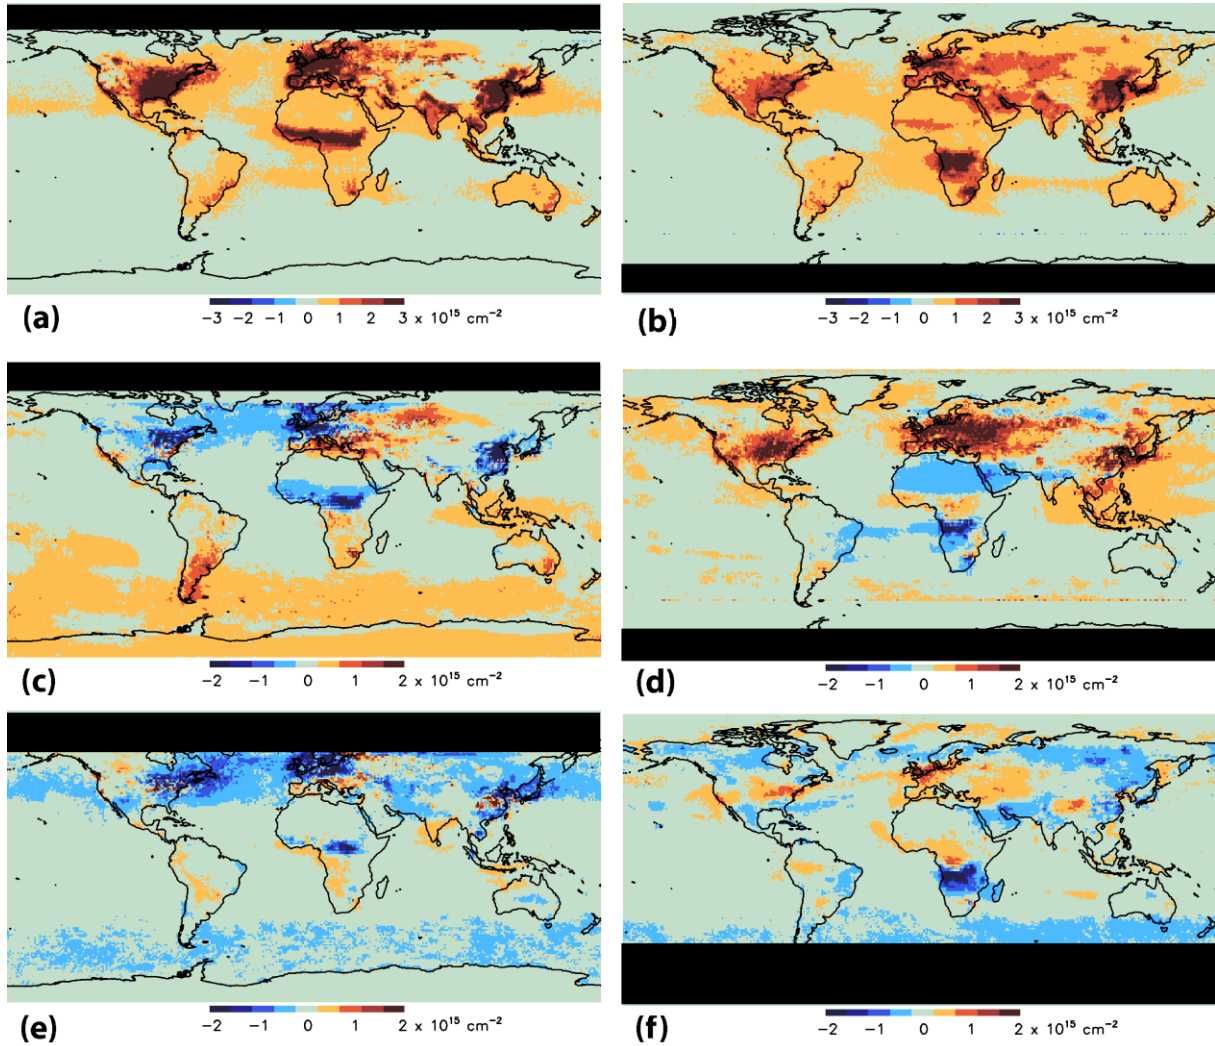

2

3 **Figure S5:** (a) Monthly mean tropospheric NO<sub>2</sub> vertical columns for January 2005 from SP2.  
4 Monthly means of tropospheric NO<sub>2</sub> differences for January 2005: (c) SP1 – SP2 and (e)  
5 DOMINO – SP2. (b) Monthly mean tropospheric NO<sub>2</sub> vertical columns for July 2005 from  
6 SP2. Monthly means of tropospheric NO<sub>2</sub> differences for July 2005: (d) SP1 – SP2 and (f)  
7 DOMINO – SP2. All monthly tropospheric averages exclude measurements with cloud  
8 radiance fractions greater than 50%.

9

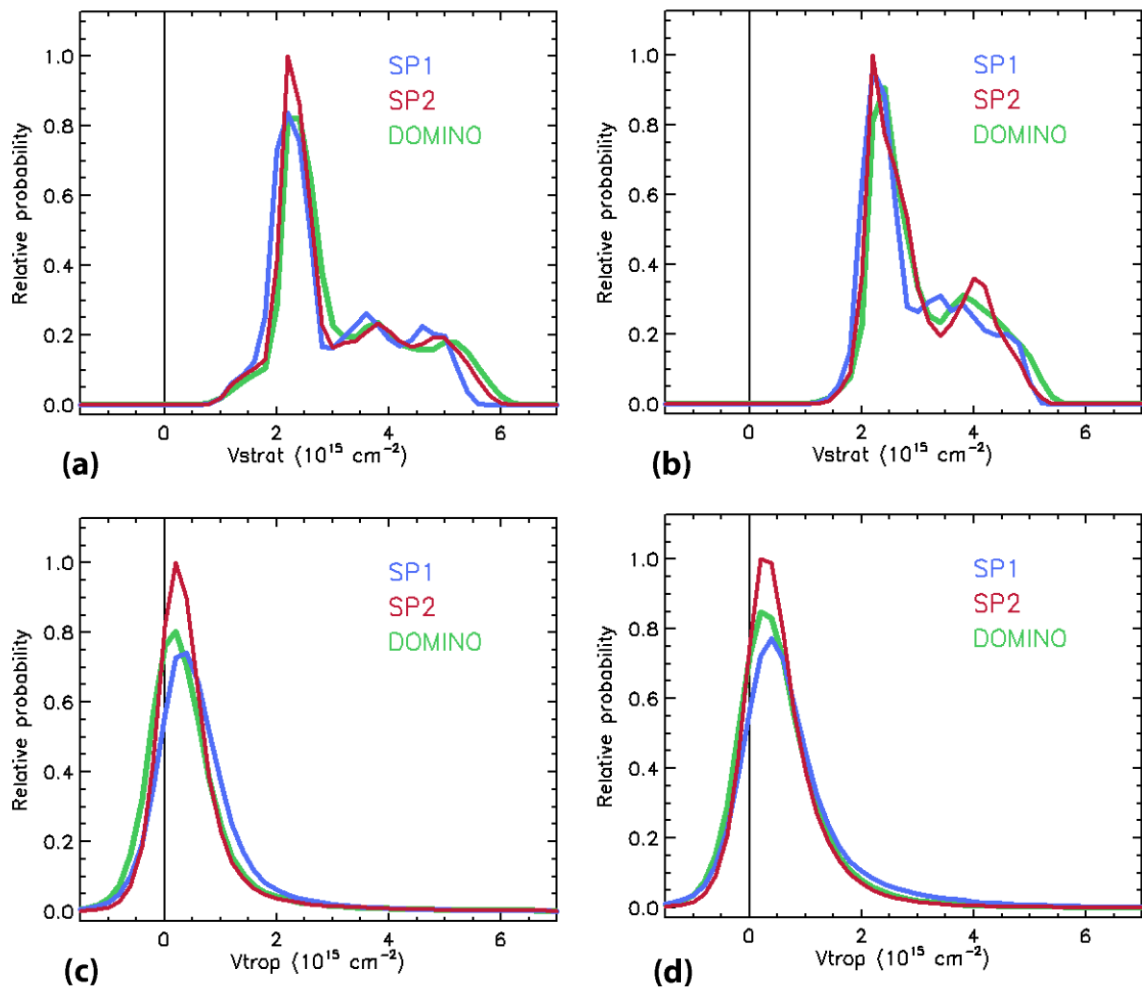

1

2 **Figure S6:** Histograms of NO<sub>2</sub> measurements from 2005 for (a) stratospheric NO<sub>2</sub> in  
 3 January, (b) stratospheric NO<sub>2</sub> in July, (c) tropospheric NO<sub>2</sub> in January and (d) tropospheric  
 4 NO<sub>2</sub> in July. All data used in this analysis are between latitudes ±70° and have solar zenith  
 5 angles less than 80°. All tropospheric data exclude measurements with cloud radiance  
 6 fractions greater than 50%.

7
